# Supplementary material
Source: PubMed Central journal article supplement (PMC3525952)

**Supporting Information to:**

***In silico* Target Fishing for Rationalized Ligand Discovery  
Exemplified on Constituents of *Ruta graveolens***

**Judith M. Rollinger<sup>1</sup>, Daniela Schuster<sup>2</sup>, Birgit Danzl<sup>1</sup>, Stefan Schwaiger<sup>1</sup>, Patrick Markt<sup>2</sup>, Michaela Schmidtke<sup>3</sup>, Jürg Gertsch<sup>4</sup>, Stefan Radurner<sup>4</sup>, Gerhard Wolber<sup>2</sup>, Thierry Langer<sup>2</sup>, Hermann Stuppner<sup>1</sup>**

**Affiliation**

<sup>1</sup> Institute of Pharmacy, Pharmacognosy, and Center for Molecular Biosciences, University of Innsbruck, 6020 Innsbruck, Austria

<sup>2</sup> Institute of Pharmacy, Pharmaceutical Chemistry, and Center for Molecular Biosciences, University of Innsbruck, Innsbruck, Austria

<sup>3</sup> Institute of Virology and Antiviral Therapy, Friedrich Schiller University, Jena, Germany

<sup>4</sup> Department of Chemistry and Applied Biosciences, ETH Zurich, Zürich, Switzerland

**Correspondence**

***A. Univ.-Professor Mag. pharm. Dr. Judith Maria Rollinger***

Institute of Pharmacy, Pharmacognosy and Center for Molecular Biosciences

University of Innsbruck

Innrain 52c

A-6020 Innsbruck

Austria

Phone: +43/512/507 5308

Fax: +43/512/507 2939

judith.rollinger@uibk.ac.at

**Fig. 1S** Hitting pharmacophore models from the parallel screen of compounds **1 – 16** for the targets AChE, HRV coat protein, and CB<sub>2</sub> receptor.

**AChE inhibitor models:**

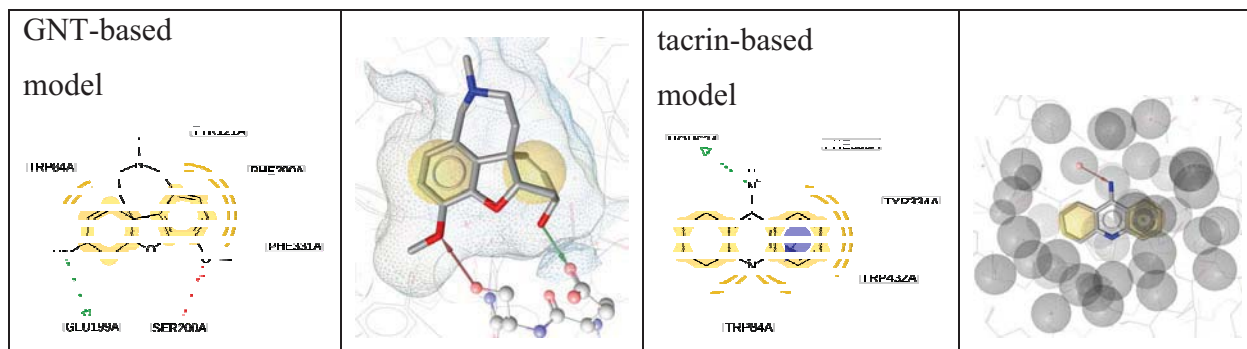

**HRV coat protein inhibitor models:**

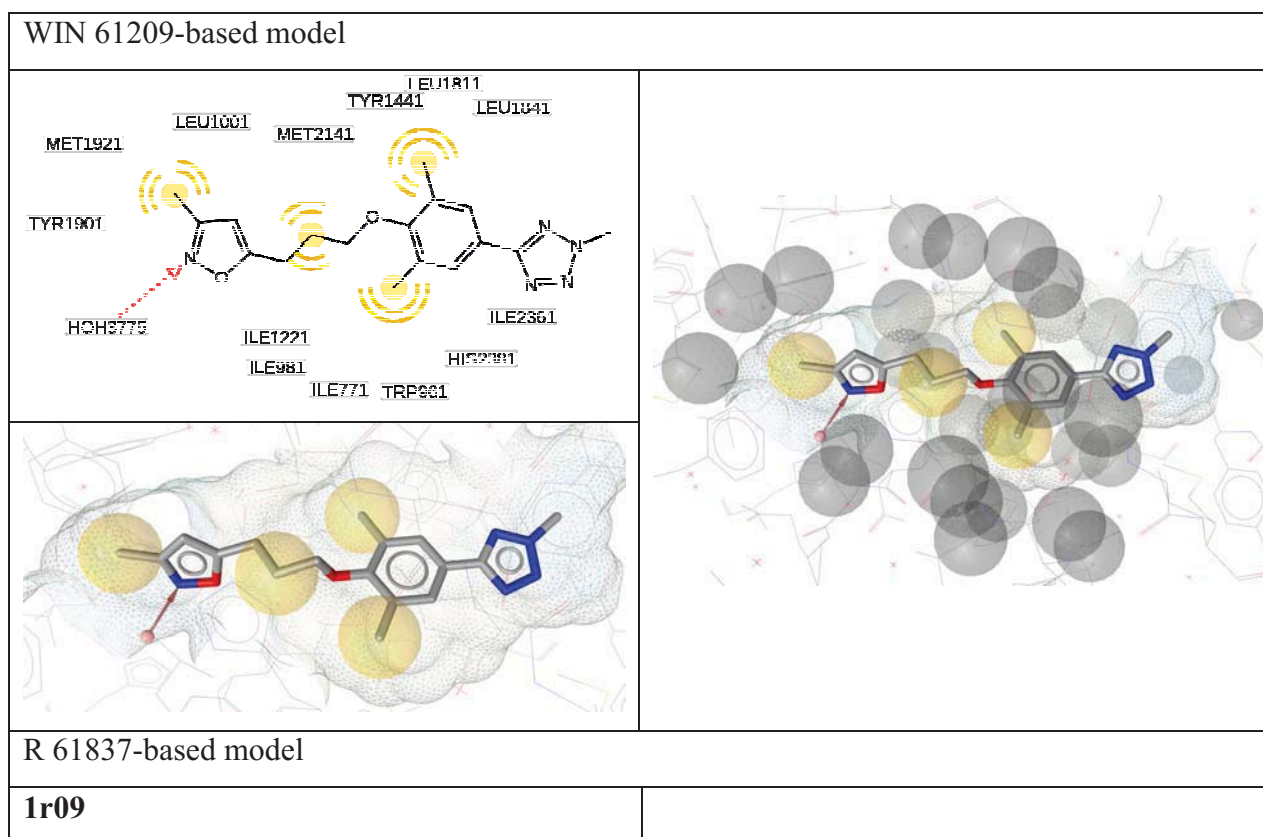

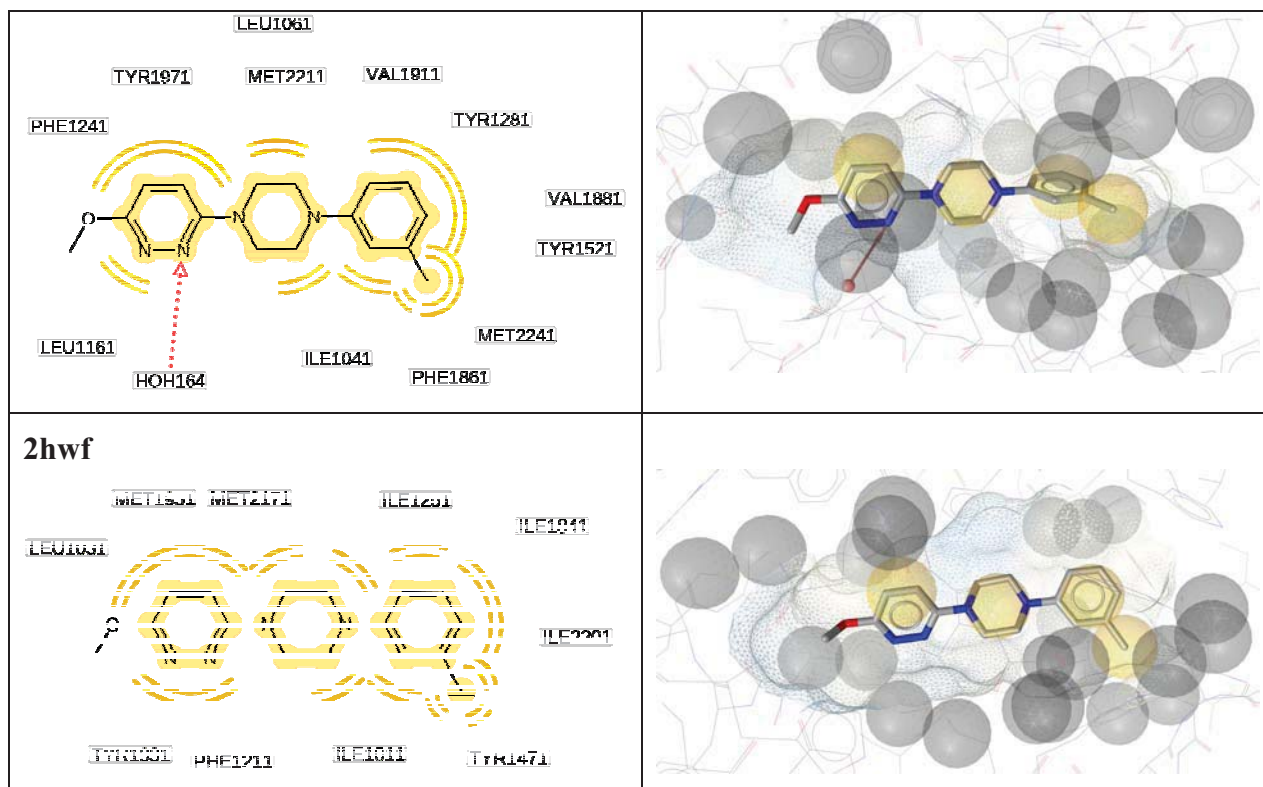

### CB<sub>2</sub> ligands model:

The generation and experimental validation of the hitting CB<sub>2</sub> pharmacophore model has just been presented by Markt et al. [46]. For its generation, five highly active and selective CB<sub>2</sub> agonists were submitted to conformational analysis and aligned employing the HipHop algorithm implemented in Catalyst 4.11 (Accelrys Inc.). The resulting pharmacophore model consists of one hydrogen bond acceptor, one hydrophobic, two hydrophobic aliphatic, and one hydrophobic aromatic feature. The shape of the highly active agonist AM1241 was added to the model to improve its restrictiveness.

**Fig. 2S** Ligand-based pharmacophore model for CB<sub>2</sub> agonists. Chemical features of the model are colour-coded: hydrogen bond acceptor – green; hydrophobic – cyan; hydrophobic aromatic – dark blue; hydrophobic aliphatic – light blue; shape – grey.

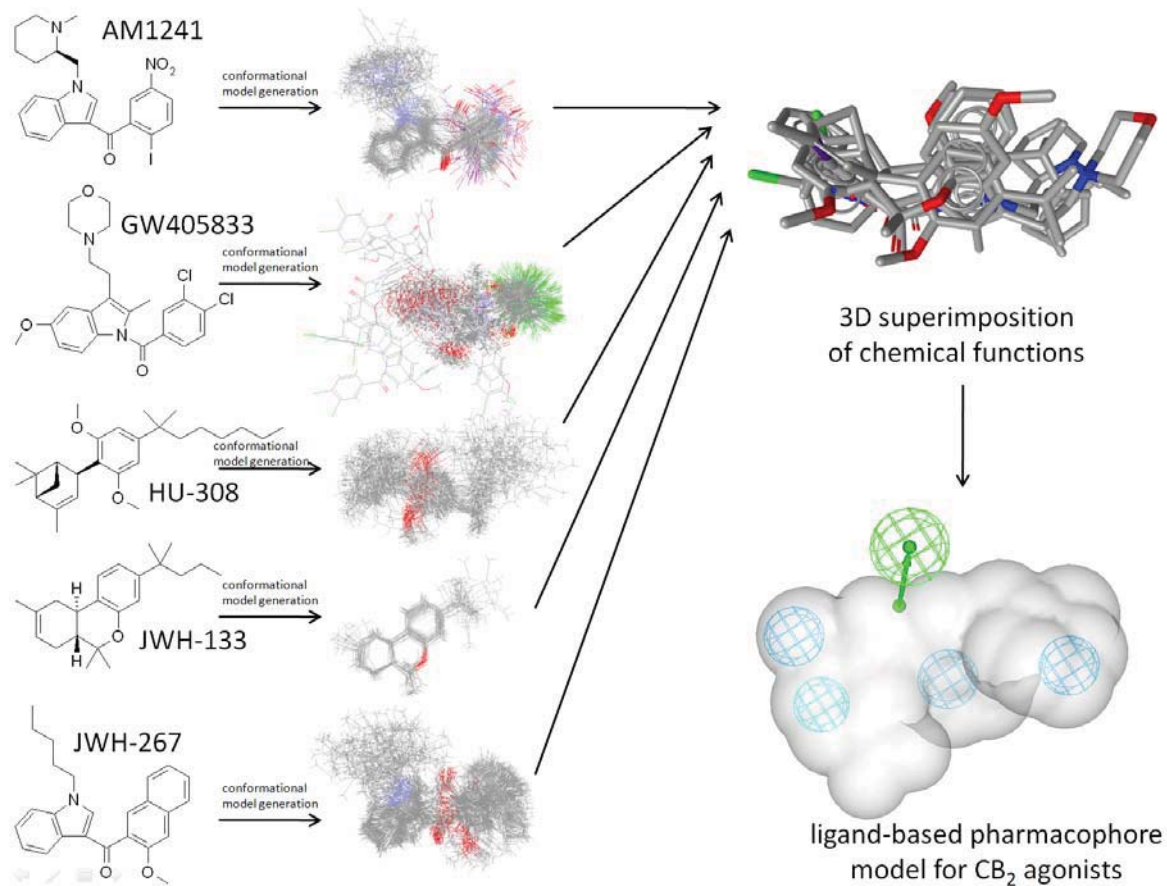

**Fig. 3S** Alignment of selected bioactive hits to a hitting pharmacophore model. **A:** Tacrin-based AChE inhibitor pharmacophore model. **B:** Compound **1** fitted into the tacrin-based model. **C:** R 61837-based model for HRV coat protein inhibitors. **D:** Compound **1** fitted into the R 61837-based model. **E:** The highly potent CB<sub>2</sub> agonist JWH-267 fitted into the ligand-based CB<sub>2</sub> pharmacophore model. **F:** Compound **3** fitted into the ligand-based CB<sub>2</sub> model. Chemical features of the models are colour-coded. Structure-based models (Fig. 3S **A-D**; LigandScout): hydrogen bond acceptor: red; hydrophobic: yellow; exclusion volumes: grey. Ligand-based models (Fig. 3S **E, F**; Discovery Studio): hydrogen bond acceptor: green; hydrophobic: cyan; hydrophobic aromatic: dark blue; hydrophobic aliphatic: light blue; shape: grey. For a clearer depiction of the fitting conformations, no excluded volume spheres are shown for the virtual hits.

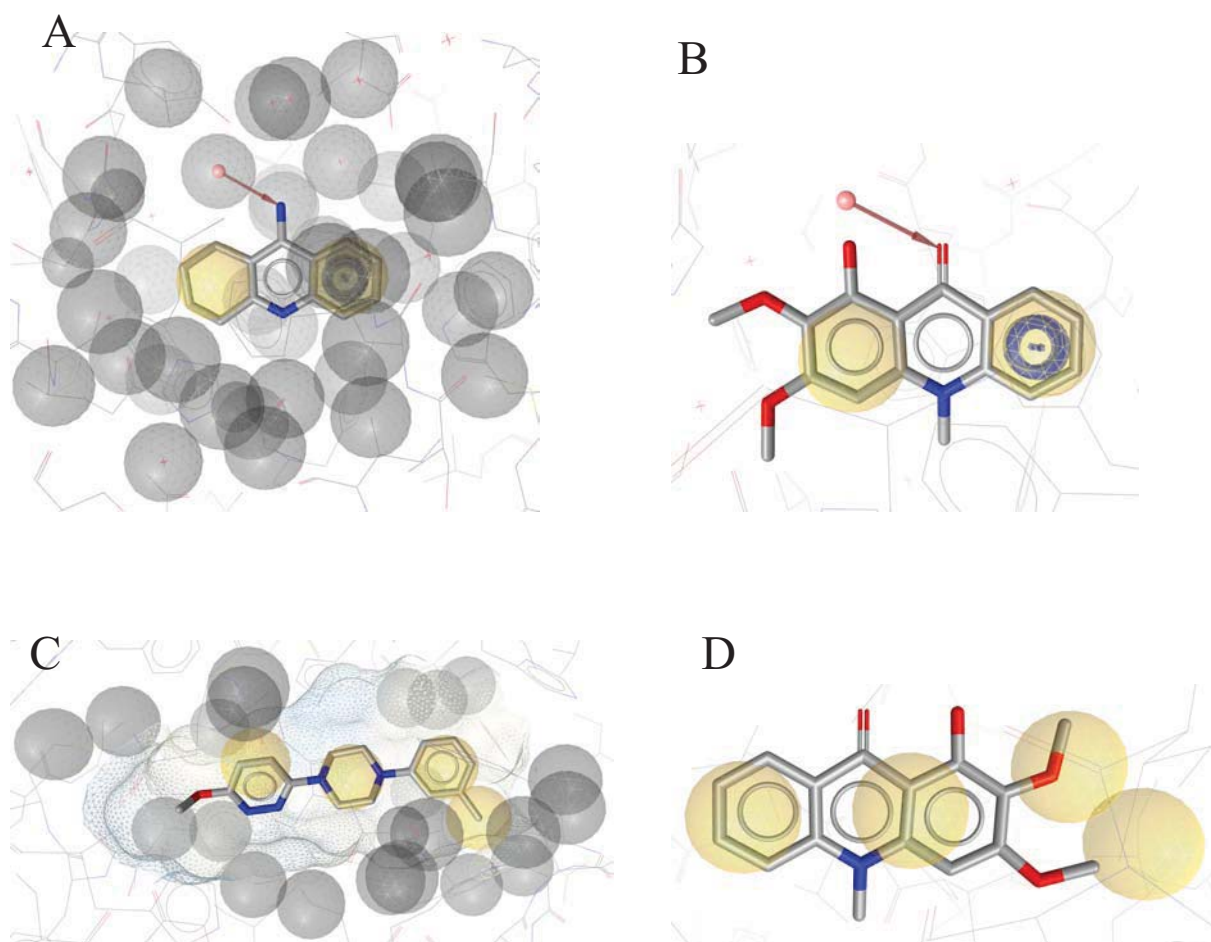

E

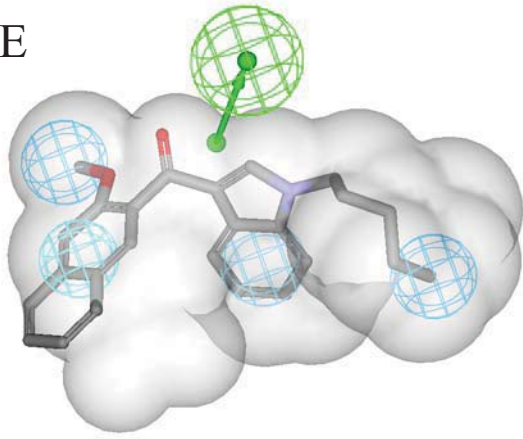

F

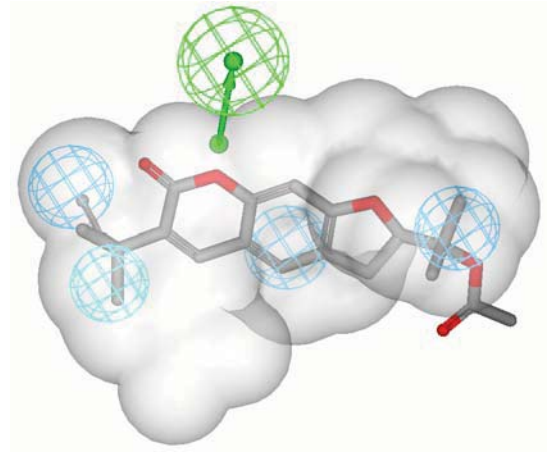

Supplement: NIHMS36858-supplement-Supporting.pdf [file NIHMS36858-supplement-Supporting.pdf]
